# Supplementary material for: Motivation and satisfaction among community health workers administering rapid diagnostic tests for malaria in Western Kenya
Source: PubMed Central journal article supplement (PMC5823030; doi:10.7189/jogh.08.010401), 2018-06
Supplement: jogh-08-010401-s001.pdf [file jogh-08-010401-s001.pdf]

# Online Supplementary Document

Winn et al. Motivation and satisfaction among community health workers administering rapid diagnostic tests for malaria in Western Kenya

J Glob Health 2018;8:010401

## Appendix S1.

### Coupon R01 CHV Participation Assessment

May 20, 2016

*Note on administration: This survey is intended to be administered orally by an enumerator to a CHV.*

#### I. Background Information

1) CHV Code and DekiReader (to be filled by enumerator):

|  |  |  |  |  |  |  |  |  |
|--|--|--|--|--|--|--|--|--|
|  |  |  |  |  |  |  |  |  |
|--|--|--|--|--|--|--|--|--|

|                             |
|-----------------------------|
| Issued DekiReader?          |
| Yes                      No |

2) Name: \_\_\_\_\_

3) Highest school level:

*Circle one of the five options below:*

1. None
2. Some Primary (not completed Class 8)
3. Primary completed
4. Primary completed and some secondary (secondary not completed)
5. Secondary completed

*If Applicable: Circle one of the four options below:*

- 6. Some College
- 7. College completed
- 8. Some University
- 9. University completed

4) For how long have you served as a CHV?  
(Enumerator: If exactly 1 year or exactly 3 years, choose option 2)

- 1. < 1
- 2. 1-3 Years
- 3. > 3-5 Years
- 4. > 5 Years

5) Apart from serving as a CHV, what other occupation(s) or volunteer positions do you have?

- 1. Farmer
- 2. Shopkeeper
- 3. Volunteer with another organization
- Write-in organization: \_\_\_\_\_
- 4. Other: \_\_\_\_\_
- \_\_\_\_\_

6) How many trainings for CHV activities of any kind have you had this year (since January)?  
(Enumerator: Read the list; Circle only one)

- 1. None
- 2. One
- 3. Two

4. Three
5. Four
6. Five
7. More than five

7) How long ago was your most recent training for CHV activities of any kind?  
(Enumerator: Read the list; Circle only one)

1. Within the past week
2. Between one week and one month ago
3. Between one and three months ago
4. Between three months and 1 year ago
5. More than one year ago

8) What was your most recent training about?  
(Enumerator: Read the list; Circle all that apply)

1. Malaria (this project)
2. Malaria (another project)

Specify: \_\_\_\_\_

3. Polio campaign
4. Other vaccination program
5. Maternal and child health topic not mentioned above
6. mHealth (Mobile Health)
7. Other: \_\_\_\_\_

\_\_\_\_\_

## II. Self-description of Role

9) In the past month, what activities have you carried out as a CHV overall?  
(Enumerator: Circle all that are mentioned; do not read the list; probe)

1. Malaria testing
2. Provide vouchers for malaria drugs
3. Mosquito net distribution
4. Provide other malaria-related services/counseling
5. Polio campaign participation
6. Other vaccination campaign(s)
7. Maternal and child health topic not mentioned above
8. Giving health education to households
9. None
10. Other: \_\_\_\_\_  
\_\_\_\_\_  
\_\_\_\_\_

10) What do you think are the most important services you provide as a CHV?  
(Enumerator: Circle all that are mentioned; do not read the list; probe)

1. Malaria testing
2. Provide vouchers for malaria drugs
3. Mosquito net distribution
4. Provide other malaria-related services/counseling
5. Polio campaign participation
6. Other vaccination campaign(s)
7. Maternal and child health services not mentioned above
9. Giving health education to households
10. None

11. Other: \_\_\_\_\_

\_\_\_\_\_

\_\_\_\_\_

11) What do you think is the most important service you provide as a CHV?  
(Enumerator: Only allow one answer; do not read the list)

1. Malaria testing

2. Provide vouchers for malaria drugs

3. Mosquito net distribution

4. Provide other malaria-related services/counseling

5. Polio campaign participation

6. Other vaccination campaign(s)

7. Maternal and child health services not mentioned above

8. Giving health education to households

9. None

10. Other: \_\_\_\_\_

\_\_\_\_\_

\_\_\_\_\_

12) How many times have you met with your CHEW in the past 3 months?  
(Enumerator: Circle only one)

1. Once
2. Twice
3. Three times
4. More than three times
5. None

13) What are the requirements for a client to receive an RDT under this malaria project?

*(Enumerator: Circle all that are mentioned; do not read the list; probe)*

1. No requirements – anyone who asks can be tested
2. Must live in my CU
3. Has a documented fever (i.e., as measured by me)
4. Has a documented fever or reports a history of recent fever
5. Has a documented fever or reports a history of recent fever or reports any symptoms of malaria
6. Consent must be provided by the client (or by the parent/guardian of a minor)
7. Must not be visibly pregnant
8. Other: \_\_\_\_\_  
\_\_\_\_\_  
\_\_\_\_\_

14) What motivates you to participate in this malaria project?

*(Enumerator: Circle all that are mentioned; do not read the list; probe)*

1. Personal desire to help the community
2. Responsibility as a CHV
3. Family
4. Organization (partner and GOK)

5. Monetary incentive (money given to group after 6 months and transport to attend supervision and supplies replenishment)

6. In-kind incentive (e.g., airtime for your phone)

7. Good relations with link facility staff, including CHEWs

8. Other: \_\_\_\_\_

\_\_\_\_\_

### **III. Satisfaction with Role**

15) What do you like about participating in this project?

*(Open-ended response; probe):* \_\_\_\_\_

\_\_\_\_\_

\_\_\_\_\_

\_\_\_\_\_

16) What don't you like about participating in this project?

*(Open-ended response; probe):* \_\_\_\_\_

\_\_\_\_\_

\_\_\_\_\_

\_\_\_\_\_

Please indicate your level of agreement with the following statements with regards to this malaria project **only**.

(Enumerator: Read the above statement then the five options: "strongly agree", "somewhat agree"... after reading each question.)

| Question                                                                                    | Strongly Agree | Somewhat Agree | Neutral | Somewhat Disagree | Strongly Disagree |
|---------------------------------------------------------------------------------------------|----------------|----------------|---------|-------------------|-------------------|
| 17) The people in my community appreciate my work on this malaria project.                  |                |                |         |                   |                   |
| 18) I have gained more recognition in my community since I began testing for malaria.       |                |                |         |                   |                   |
| 19) I believe the clients that test positive for malaria follow the advice that I give them |                |                |         |                   |                   |
| 20) I believe the clients that test negative for malaria follow the advice that I give them |                |                |         |                   |                   |
| 21) I receive enough supervision in my work from the malaria project study staff.           |                |                |         |                   |                   |
| 22) Overall, I am confident in my ability to perform my role in this malaria project.       |                |                |         |                   |                   |
| 23) Overall, I enjoy carrying out my role in this malaria project.                          |                |                |         |                   |                   |
| 24) I would like to continue with my role in this malaria project.                          |                |                |         |                   |                   |



25) *If the CHV answers “50-50”, somewhat disagree” or “strongly disagree” to continuing their role in the project, why?  
(Enumerator: Circle all that are mentioned; do not read the list; probe)*

- 1. Requires too much time
- 2. Requires too much effort
- 3. Don't receive enough appreciation
- 4. Don't receive compensation
- 5. Frustrated that they can't provide drugs directly to clients
- 6. Conflicts with other CHV activities
- 7. Conflicts with non-CHV activities / responsibilities

For 7: Record activities mentioned: \_\_\_\_\_

8. Other: \_\_\_\_\_

\_\_\_\_\_

\_\_\_\_\_

#### **IV. Logistics & Challenges of Role**

##### **A. Implementation**

##### **i. Community awareness & trust of services**

26) Are people in your village aware that you provide RDT testing?  
(Enumerator: Read all the options, circle only one)

- 1. Everyone is aware
- 2. Most are aware
- 3. Some are aware
- 4. Most are *not* aware
- 5. None are aware

27) Are the people in your village aware that you provide a voucher for malaria drugs if RDT is positive?

*(Enumerator: Read all the options, circle only one)*

1. Everyone is aware
2. Most are aware
3. Some are aware
4. Most are *not* aware
5. None are aware

28) How do you think your clients learn about the malaria services (testing and vouchers) that you provide as a part of this malaria project?

*(Enumerator: Circle all that are mentioned; do not read the list; probe)*

1. From me
2. From family members
3. From neighbors / friends
4. From village leaders
5. From health facility staff
6. From malaria project staff
7. Other: \_\_\_\_\_  
\_\_\_\_\_  
\_\_\_\_\_

Please indicate your level of agreement with the following statements.

*(Enumerator: Before reading the questions, explain: "For the next four questions, answer 'strongly agree', 'somewhat agree,' '50-50,' 'somewhat disagree,' or 'strongly disagree'" Then restate the five options after reading each question.)*

| <b>Question</b>                                                                                       | <b>Strongly Agree</b> | <b>Somewhat Agree</b> | <b>Neutral</b> | <b>Somewhat Disagree</b> | <b>Strongly Disagree</b> |
|-------------------------------------------------------------------------------------------------------|-----------------------|-----------------------|----------------|--------------------------|--------------------------|
| 29) The malaria RDT that I do can be trusted just as much as a malaria RDT done in a health facility. |                       |                       |                |                          |                          |
| 30) The clients that test positive for malaria trust the results of the test                          |                       |                       |                |                          |                          |
| 31) The clients that test negative for malaria trust the results of the test                          |                       |                       |                |                          |                          |
| 32) People I test for malaria believe I am actually testing for HIV.                                  |                       |                       |                |                          |                          |

33) Do any of your clients refuse an RDT when you offer it?

1. Yes
2. No

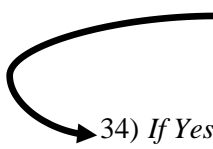

34) *If Yes to above, What are the reasons that you think these clients refuse?*  
(Enumerator: Circle all that are mentioned; do not read the list; probe)

1. They don't understand why it is necessary
2. They don't trust me
3. They don't trust the test
4. They are already convinced they have malaria
5. They plan to buy antimalarial drugs regardless of test result
6. They don't want to be pricked
7. They think it may really be an HIV test
8. Other: \_\_\_\_\_

---

---

---

**ii. Logistics & Challenges**

35) What are all of the ways that clients contact you to receive a malaria RDT?  
(Enumerator: Circle all that are mentioned; do not read the list; probe)

1. Clients contact me at my home
2. Clients contact me at a health facility
3. Clients contact me at church
4. I contact clients at their homes
5. Clients contact me at another public location
6. Clients contact me at another private location
7. Clients call my mobile phone
8. The study staff contacts me

9. The health facility contacts me

10. Other: \_\_\_\_\_

\_\_\_\_\_

\_\_\_\_\_

36) Where do you do testing for malaria?

*(Enumerator: Circle all that are mentioned; do not read the list; probe)*

1. At my home

2. At a health facility

3. At church

4. At client's home

5. At another public location

6. At another private location

7. At CHV Office

**8.** In Barazas (public meeting)

9. Other: \_\_\_\_\_

\_\_\_\_\_

\_\_\_\_\_

37) How often do you lack any of the supplies you need to perform the malaria services of testing and providing vouchers when necessary?

*(Enumerator: Read the following five options; Circle only one)*

1. I am always lacking a necessary supply

2. I sometimes have all of the supplies I need

3. I always have all of the supplies I need

38) Which, if any, supplies related to the malaria services you perform for this project have you lacked in the past month?

*(Enumerator: Circle all that are mentioned; do not read the list; probe)*

1. RDTs

2. Buffer

3. Lancets

4. Pipettes

5. Alcohol swabs

6. Cotton wool

7. Gloves

8. Safety disposal box

9. Yellow waste bags

10. Plastic (zip-loc) bags

11. Thermometer

12. Thermometer batteries

13. Pen

14. Encounter forms

15. Voucher forms

16. None

17. Other: \_\_\_\_\_

\_\_\_\_\_

\_\_\_\_\_

39) What are the main challenges you face in implementing this malaria project?  
(Enumerator: Circle all that are mentioned; do not read the list; probe)

1. The clients don't trust the test.
2. Transport
3. Not enough training
4. Not enough supervision from study staff and/or CHEWs.
5. Lack of supplies
6. Competing activities
7. Very few clients coming for test
8. Nature of the community not willing to interact with CHVs
9. Cultural practices e.g use of herbal medicine, seeking help from traditional healers
10. Level of understanding of community member
11. Lack of mobilization at the community
12. Family relationships are affected
13. Other: \_\_\_\_\_

---

---

40) How often would you prefer supervision to be carried out?

*(Enumerator: Read the list; Circle only one)*

1. Once a week
2. Once every two weeks
3. Once a month
4. Once every two months
5. Other: \_\_\_\_\_

41) Why do you think we supervise your work with this malaria project?

*(Enumerator: Circle all that are mentioned; do not read the list; probe)*

1. To monitor whether I make any mistakes
2. To provide additional training
3. To ensure data quality
4. Other: \_\_\_\_\_

42) What would help you perform your role in this malaria project better?

*(Enumerator: Circle all that are mentioned; do not read the list; probe)*

1. More training
2. More supervision from study team
3. More supervision from CHEWs
4. More regular restocking of supplies
5. Raising community awareness about the project
6. Compensation for time spent
7. Sharing my CHV duties with another CHV
8. Other: \_\_\_\_\_

\_\_\_\_\_  
\_\_\_\_\_



**iii. Time required**

43) On average, how long does it take you to complete a visit with a patient complaining of malaria symptoms?

*(Enumerator: Be sure to record the time in minutes)*

\_\_\_\_\_ Minutes

44) How many hours do you think you spend on all your CHV activities combined in an average week?

*(Enumerator: Read the examples in parentheses; Be sure to record the time in hours; PROBE)*

\_\_\_\_\_ Hours

45) How of those total hours do you think are for this malaria project work in an average week?

*(Enumerator: Read the examples in parentheses; Be sure to record the time in hours; PROBE)*

\_\_\_\_\_ Hours

46) Do you think the total time you spend on all CHV activities has decreased, increased, or stayed about the same since you began the activities for this malaria project?

*(Enumerator: Read the list; Circle only one)*

1. Decreased
2. Stayed about the same
3. Increased

**B. Relation to other CHV activities**

47) Has participating in this malaria project had an effect on your other CHV activities?

1. Yes

2. No

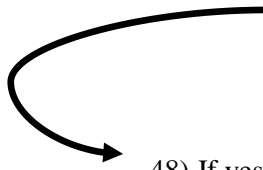

48) If yes, in what ways:

*(Enumerator: Circle all that are mentioned; do not read the list; probe)*

1. Improved skills applicable to other CHV activities

2. More clients visit me for non-malaria services

3. Less time to complete other CHV activities

4. Other: \_\_\_\_\_

49) Please indicate to what extent you agree with the statement: Due to my involvement with this malaria project, I now provide more non-malaria health services than before this malaria project.

*(Enumerator: Read the following five options; Circle only one; probe)*

1. I provide much more non-malaria health services than before
2. I provide somewhat more non-malaria health services than before
3. The amount of non-malaria health services I provide has stayed the same
4. I provide somewhat less non-malaria health services than before
5. I provide much less non-malaria health services than before

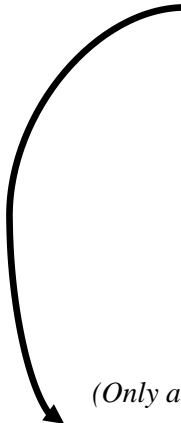

*(Only ask the next 2 questions if 1 “much more” or 2 “somewhat more” above):*

50) If 1 “much more” or 2 “somewhat more” above: What are the other (non-malaria) services you provide more of due to your involvement in this project?

*(Enumerator: Circle all that are mentioned; do not read the list; probe)*

1. Maternal and child health services
2. Vaccinations
3. Providing health information
4. Other: \_\_\_\_\_  
\_\_\_\_\_  
\_\_\_\_\_

51) If 1 “much more” or 2 “somewhat more” above: To whom do you provide more non-malaria services than before this malaria project started? (select all that apply):

*(Enumerator: Circle all that are mentioned; do not read the list; probe)*

1. Men
2. Women
3. Children
4. Other: \_\_\_\_\_

52) In the last month, how if at all, has the amount of time required for your CHV work affected your ability to perform your other responsibilities not related to community health work?

*(Enumerator: Read the following three options; Circle only one)*

1. There has been no change in my ability to perform my other responsibilities.
2. My work as a CHV has interfered somewhat with my other responsibilities
3. My work as a CHV has interfered very much with my other responsibilities.

53) What, if any, responsibilities outside of your role as a CHV have been affected?

*(Enumerator: Circle all that are mentioned; do not read the list; probe)*

1. Childcare
2. Family responsibilities
3. Other work
4. Other volunteering / community activities
5. Religious activities
6. None
7. Other: \_\_\_\_\_  
\_\_\_\_\_  
\_\_\_\_\_

**If Deki Reader circled “yes” in question 1 on the front page, ask the following three questions (64-66)**  
**If “No,” skip these questions**

54.) To what extent would you agree with the statement, “The DekiReader was easy to use correctly”?  
(Enumerator: Read the following five options; Circle only one)

1. Strongly agree
2. Somewhat agree
3. 50-50
4. Somewhat disagree
5. Strongly disagree

55.) To what extent would you agree with the statement, “The Deki Reader helped me improve my ability to perform RDTs correctly”?

(Enumerator: Read the following five options; Circle only one)

1. Strongly agree
2. Somewhat agree
3. 50-50
4. Somewhat disagree
5. Strongly disagree

56.) If you had the option to use the Deki Reader for every test as part of your routine work, would you want to have it or not?

(Enumerator: Circle only one)

1. Yes
2. No
3. Don't Know / Unsure

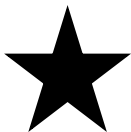

**CONTINUE TO THE FINAL PAGE TO ASK THE LAST QUESTION (57)!**

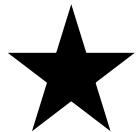

57.) Do you have any concerns or suggestions to improve the implementation of this malaria project?

*(Open-ended response; probe):*

---

---

---

---

---

---

---

---

*Thank you for your participation and feedback!*

**Figure S1**

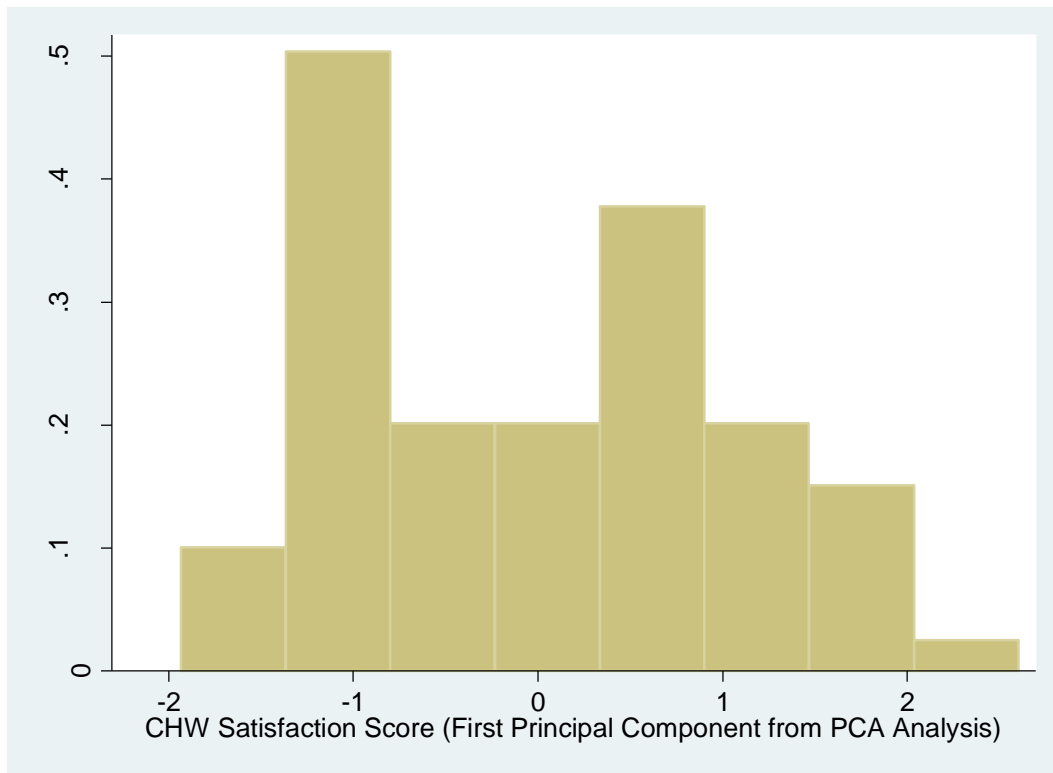

**Appendix Figure A1.** Distribution of CHW satisfaction score (First Principal Component from principal components analysis)
